# Supplementary material for: New 3D measurements of large redwood trees for biomass and structure
Source: PubMed Central journal article supplement (PMC7566452; doi:10.1038/s41598-020-73733-6), 2020-10-15
Supplement: 41598_2020_73733_MOESM1_ESM.pdf [file 41598_2020_73733_MOESM1_ESM.pdf]

# Supplementary: New 3D measurements of large redwood trees for biomass and structure

September 1, 2020

Mathias Disney, John Armston, Andrew Burt, Laura Duncason and Phil Wilkes  
m.disney@ucl.ac.uk

## Allometric model details

Table S1 shows the details of all published and TLS-derived (this study) models used. For the previously published models all coefficients a-d are taken direct from the publications. For the TLS-derived DTB, H model, model coefficients are obtained by fitting the Sillett et al. (2019)<sup>8</sup> model to the TLS-derived estimates of volume using TLS estimates of DTB and H. The same is true for the H only model with the given form.

Table S1: Allometric model forms and parameter values. See Methods for definitions of DTB and fDBH.

| Model                                 | Form                                       | a                       | b      | c                       | d      |
|---------------------------------------|--------------------------------------------|-------------------------|--------|-------------------------|--------|
| Parks (1952) <sup>10</sup>            | $\log_{10}(Vol) = a\log_{10}(DBH^2H) - b$  | 0.9246                  | 0.4147 |                         |        |
| Fujimori (1977) <sup>2</sup>          | $\log_{10}(Vol) = a\log_{10}(DBH^2H) - b$  | 0.9784                  | 0.4843 |                         |        |
| Sillett et al. (2015) <sup>19</sup>   | $AGB = aDTB^b + cfDBH^d$                   | $3.9656 \times 10^{-4}$ | 2.3122 | $1.9583 \times 10^{-3}$ | 1.8657 |
| Sillett et al. (2015) <sup>19</sup>   | $Vol = aDTB^b + cfDBH^d$                   | $2.2529 \times 10^{-4}$ | 2.3747 | $1.2574 \times 10^{-3}$ | 1.9171 |
| Sillett et al. (2019) <sup>8</sup>    | $AGB = aDTB^b + cH^d$                      | $7.585 \times 10^{-2}$  | 2.401  | $3.468 \times 10^{-3}$  | 3.301  |
| Sillett et al. (2019) <sup>8</sup>    | $Vol = aDTB^b + cH^d$                      | $2.752 \times 10^{-4}$  | 2.372  | $1.173 \times 10^{-5}$  | 3.306  |
| TLS-derived                           | $Vol = aDTB^b + cH^d$                      | $7.667 \times 10^{-5}$  | 2.624  | 0.159                   | 1.040  |
| TLS H only                            | $Vol = aH^b + c$                           | $1.203 \times 10^{-8}$  | 5.36   | 4.97                    |        |
| Kizha & Han (2015) <sup>9</sup>       | $\log_{10}(AGB) = a + b\log_{10}(DBH) + c$ | -0.8252                 | 2.2607 | 0.0054                  |        |
| Jenkins et al. (2003) <sup>51</sup>   | $\ln(AGB) = a + b\ln(DBH)$                 | -2.0336                 | 2.2592 |                         |        |
| Chojnacky et al. (2014) <sup>52</sup> | $\ln(AGB) = a + b\ln(DBH)$                 | -2.7765                 | 2.4195 |                         |        |

## Size of trees in all plots

Figure S1 (left panel) shows the fit of VOL:H allometry derived from the TLH estimates of H, with the model parameters in Table S1. The right panel shows the scatter plot of volume estimated using TLS-derived H-only allometry, with the full Sillett et al. (2015)<sup>19</sup> allometry. This is included as a demonstration of the ability of a H-only allometry based on the TLS data to predict the volume of *Sequoia sempervirens* trees. This relationship would potentially allow Earth Observation-derived estimates of H to be used to estimate volume (and AGB). Unsurprisingly, the model fit is worse than that of the DBH, H models (with large uncertainty in the 60-70m height range), but with greater model parsimony.

Tables S2-S4 show the size of all *Sequoia sempervirens* trees extracted from plots at each of the three sites, in height order.

Table S2: Size of trees in Grove of Old Trees, plot CAL-01.

| x (m) | y (m) | H (m) | DBH (m) | DTB (m) | fDBH (m) |
|-------|-------|-------|---------|---------|----------|
| 4.89  | 5.86  | 19.57 | 1.14    | 1.02    | 1.23     |
| 15.75 | 17.16 | 44.71 | 1.10    | 1.00    | 1.18     |
| 17.74 | 19.55 | 50.04 | 1.26    | 1.18    | 1.33     |
| 14.32 | 18.62 | 57.99 | 1.34    | 1.23    | 1.49     |
| 14.25 | 15.69 | 58.01 | 1.20    | 1.16    | 1.27     |

|       |       |       |      |      |      |
|-------|-------|-------|------|------|------|
| 13.22 | 13.59 | 58.57 | 1.15 | 1.09 | 1.24 |
| 14.66 | 12.84 | 58.60 | 1.29 | 1.13 | 1.36 |
| 16.47 | 14.97 | 58.85 | 1.01 | 0.98 | 0.48 |
| 13.55 | 14.86 | 59.94 | 1.27 | 1.17 | 1.33 |
| 17.17 | 18.10 | 63.71 | 2.08 | 1.92 | 2.22 |
| 11.30 | 16.16 | 64.29 | 1.39 | 1.26 | 1.50 |
| 19.09 | 15.40 | 64.59 | 1.22 | 1.06 | 1.30 |
| 16.57 | 13.09 | 66.15 | 1.73 | 1.57 | 1.81 |
| 20.00 | 20.00 | 66.65 | 2.82 | 2.48 | 3.04 |
| 18.51 | 17.93 | 67.68 | 2.04 | 1.88 | 2.14 |
| 13.63 | 16.89 | 67.83 | 1.22 | 1.15 | 1.30 |
| 13.81 | 17.19 | 68.10 | 1.75 | 1.66 | 1.85 |
| 13.80 | 14.87 | 68.11 | 1.60 | 1.41 | 1.73 |
| 18.18 | 14.77 | 68.69 | 1.83 | 1.67 | 1.91 |
| 18.40 | 19.39 | 69.58 | 1.87 | 1.74 | 1.97 |
| 15.49 | 15.82 | 70.17 | 2.68 | 2.25 | 2.87 |
| 14.53 | 16.29 | 70.66 | 1.50 | 1.31 | 1.60 |
| 14.49 | 15.43 | 70.94 | 1.35 | 1.22 | 1.45 |
| 19.56 | 17.52 | 72.90 | 2.16 | 2.11 | 2.26 |
| 15.77 | 16.13 | 73.34 | 2.35 | 2.06 | 2.48 |
| 15.98 | 15.51 | 87.79 | 3.39 | 2.95 | 3.49 |

Table S3: Size of trees in Armstrong State Natural Reserve, plot CAL-02.

| x (m) | y (m) | H (m) | DBH (m) | DTB (m) | fDBH (m) |
|-------|-------|-------|---------|---------|----------|
| 6.60  | 6.58  | 15.34 | 0.24    | 0.17    | 0.27     |
| 6.37  | 5.78  | 19.55 | 0.25    | 0.19    | 0.28     |
| 11.10 | 13.07 | 36.78 | 0.78    | 0.69    | 0.86     |
| 11.99 | 9.61  | 36.85 | 0.88    | 0.69    | 0.99     |
| 11.40 | 8.74  | 37.65 | 0.83    | 0.66    | 0.88     |
| 14.28 | 8.23  | 38.17 | 0.88    | 0.71    | 0.97     |
| 14.81 | 11.19 | 38.52 | 0.89    | 0.68    | 0.98     |
| 7.03  | 13.62 | 41.06 | 0.91    | 0.77    | 0.99     |
| 9.71  | 11.88 | 47.87 | 1.27    | 0.81    | 1.45     |
| 8.37  | 6.47  | 51.54 | 1.27    | 1.12    | 1.31     |
| 12.96 | 7.36  | 53.86 | 1.06    | 0.92    | 1.11     |
| 12.30 | 9.04  | 53.98 | 1.07    | 0.93    | 1.12     |
| 4.95  | 5.14  | 55.62 | 1.20    | 1.09    | 1.26     |
| 9.08  | 8.79  | 55.85 | 0.77    | 0.72    | 0.81     |
| 9.09  | 6.76  | 55.86 | 0.93    | 0.96    | 0.96     |
| 4.25  | 4.43  | 56.23 | 1.48    | 1.26    | 1.55     |
| 13.67 | 11.05 | 59.19 | 0.73    | 0.71    | 0.77     |
| 10.14 | 10.78 | 59.56 | 1.55    | 1.30    | 1.61     |
| 10.40 | 7.09  | 60.22 | 0.79    | 0.70    | 0.83     |
| 12.37 | 15.13 | 60.76 | 1.46    | 1.35    | 1.55     |
| 11.79 | 15.29 | 61.26 | 1.18    | 1.26    | 1.25     |
| 11.93 | 10.69 | 62.14 | 1.36    | 1.25    | 1.41     |
| 5.32  | 5.96  | 63.29 | 1.36    | 1.10    | 0.70     |
| 14.93 | 12.42 | 63.30 | 1.49    | 1.27    | 1.56     |
| 11.29 | 17.63 | 63.69 | 1.72    | 1.54    | 1.98     |
| 8.35  | 10.93 | 63.78 | 1.58    | 1.32    | 1.64     |
| 8.63  | 7.49  | 63.90 | 1.60    | 1.31    | 1.67     |
| 19.33 | 10.82 | 64.33 | 2.10    | 1.81    | 2.20     |
| 13.15 | 17.15 | 64.71 | 1.62    | 1.41    | 1.69     |
| 14.04 | 26.11 | 64.95 | 2.10    | 1.81    | 2.20     |
| 15.36 | 11.46 | 66.65 | 1.06    | 0.96    | 1.12     |
| 15.55 | 17.55 | 66.71 | 2.26    | 2.03    | 2.37     |
| 12.41 | 12.84 | 68.87 | 1.73    | 1.50    | 1.83     |

|       |       |       |      |      |      |
|-------|-------|-------|------|------|------|
| 16.24 | 20.22 | 68.87 | 1.73 | 1.50 | 1.82 |
| 7.35  | 6.45  | 69.04 | 1.75 | 1.51 | 1.83 |
| 14.37 | 18.49 | 70.40 | 1.87 | 1.91 | 2.00 |
| 14.29 | 16.57 | 71.65 | 2.02 | 1.72 | 2.08 |
| 16.06 | 23.52 | 72.49 | 1.78 | 1.54 | 1.86 |

Table S4: Size of trees in Richardson Reserve, plot CAL-07.

| x (m) | y (m) | H (m) | DBH (m) | DTB (m) | fDBH (m) |
|-------|-------|-------|---------|---------|----------|
| 2.20  | 2.77  | 19.45 | 0.27    | 0.27    | 0.30     |
| 3.28  | 3.29  | 23.79 | 0.35    | 0.95    | 0.39     |
| 3.40  | 4.52  | 28.16 | 0.55    | 0.49    | 0.60     |
| 4.12  | 3.95  | 32.06 | 0.44    | 0.37    | 0.47     |
| 3.25  | 3.97  | 34.50 | 0.43    | 0.36    | 0.47     |
| 3.69  | 3.37  | 34.51 | 0.39    | 0.36    | 0.44     |
| 1.52  | 3.81  | 37.99 | 0.74    | 0.66    | 0.79     |
| 4.60  | 4.28  | 38.43 | 0.47    | 0.43    | 0.50     |
| 2.63  | 3.18  | 40.30 | 0.26    | 0.23    | 0.29     |
| 3.02  | 6.26  | 41.49 | 0.56    | 0.50    | 0.60     |
| 3.71  | 4.65  | 41.73 | 0.47    | 0.43    | 0.54     |
| 4.74  | 4.88  | 41.89 | 0.82    | 0.65    | 0.80     |
| 5.12  | 5.99  | 42.53 | 0.56    | 0.53    | 0.62     |
| 5.99  | 5.66  | 42.53 | 0.61    | 0.57    | 0.67     |
| 5.01  | 5.00  | 43.16 | 0.63    | 0.56    | 0.68     |
| 6.24  | 6.26  | 43.73 | 0.65    | 0.60    | 0.71     |
| 7.35  | 2.78  | 43.81 | 0.50    | 0.43    | 0.53     |
| 6.72  | 6.37  | 43.88 | 0.69    | 0.62    | 0.74     |
| 7.69  | 3.24  | 45.37 | 0.70    | 0.64    | 0.74     |
| 4.84  | 3.09  | 45.46 | 0.48    | 0.42    | 0.51     |
| 7.69  | 4.19  | 45.54 | 0.64    | 0.55    | 0.71     |
| 8.15  | 4.82  | 46.11 | 0.79    | 0.75    | 0.85     |
| 5.66  | 2.85  | 46.13 | 0.68    | 0.62    | 0.73     |
| 4.36  | 4.10  | 46.85 | 0.72    | 0.67    | 0.76     |
| 5.97  | 7.60  | 46.85 | 0.84    | 0.74    | 0.90     |
| 6.39  | 6.28  | 46.86 | 0.72    | 0.67    | 0.77     |
| 5.42  | 5.46  | 46.91 | 0.79    | 0.71    | 0.84     |
| 5.57  | 4.17  | 46.98 | 0.70    | 0.65    | 0.75     |
| 4.93  | 8.20  | 47.11 | 0.79    | 0.73    | 0.86     |
| 10.12 | 10.81 | 47.19 | 0.86    | 0.74    | 0.92     |
| 4.19  | 4.18  | 47.41 | 0.68    | 0.54    | 0.74     |
| 7.44  | 7.45  | 47.77 | 0.71    | 0.69    | 0.78     |
| 7.59  | 6.88  | 47.82 | 0.76    | 0.72    | 0.83     |
| 5.65  | 4.80  | 47.87 | 0.61    | 0.56    | 0.66     |
| 3.59  | 3.62  | 48.13 | 0.70    | 0.60    | 0.78     |
| 7.95  | 7.85  | 48.28 | 0.87    | 0.79    | 0.93     |
| 7.11  | 7.05  | 48.43 | 0.70    | 0.65    | 0.74     |
| 4.00  | 5.83  | 48.51 | 0.61    | 0.57    | 0.68     |
| 4.86  | 4.57  | 48.70 | 0.51    | 0.44    | 0.55     |
| 7.09  | 4.31  | 49.07 | 0.72    | 0.67    | 0.78     |
| 7.28  | 4.55  | 49.13 | 0.76    | 0.70    | 0.83     |
| 8.22  | 8.91  | 50.02 | 0.94    | 0.84    | 0.99     |
| 5.72  | 4.72  | 50.26 | 0.85    | 0.77    | 0.91     |
| 4.89  | 9.73  | 50.75 | 0.75    | 0.65    | 0.79     |
| 6.09  | 5.92  | 51.05 | 0.67    | 0.57    | 0.74     |
| 7.49  | 7.77  | 51.08 | 0.83    | 0.73    | 0.91     |
| 6.61  | 8.37  | 51.92 | 0.86    | 0.77    | 0.90     |
| 9.06  | 6.61  | 52.61 | 0.82    | 0.78    | 0.87     |
| 8.53  | 9.46  | 52.74 | 0.87    | 0.78    | 0.94     |
| 6.10  | 6.32  | 52.89 | 0.91    | 0.83    | 0.95     |

|       |       |       |      |      |      |
|-------|-------|-------|------|------|------|
| 9.29  | 9.93  | 52.97 | 1.00 | 0.92 | 1.06 |
| 1.71  | 10.23 | 53.69 | 0.84 | 0.76 | 0.89 |
| 8.89  | 7.26  | 53.89 | 0.94 | 0.83 | 1.01 |
| 9.00  | 9.51  | 53.90 | 0.90 | 0.84 | 0.96 |
| 7.75  | 9.33  | 55.74 | 0.92 | 0.85 | 0.99 |
| 6.82  | 6.65  | 55.85 | 0.67 | 0.60 | 0.72 |
| 9.51  | 9.64  | 55.96 | 1.07 | 0.93 | 1.11 |
| 4.21  | 9.90  | 56.31 | 0.84 | 0.75 | 0.90 |
| 12.49 | 11.05 | 57.54 | 0.82 | 0.76 | 0.86 |
| 9.39  | 10.25 | 57.54 | 0.85 | 0.75 | 0.89 |
| 10.50 | 10.12 | 57.61 | 1.09 | 0.99 | 1.15 |
| 5.26  | 7.53  | 57.88 | 0.79 | 0.74 | 0.84 |
| 9.17  | 6.40  | 57.96 | 0.94 | 0.85 | 1.00 |
| 8.82  | 9.32  | 58.30 | 0.96 | 0.87 | 1.00 |
| 8.87  | 5.89  | 58.35 | 0.94 | 0.86 | 1.02 |
| 8.92  | 8.77  | 58.72 | 0.91 | 0.84 | 0.93 |
| 7.85  | 7.59  | 58.86 | 0.83 | 0.76 | 0.88 |
| 8.67  | 9.04  | 58.91 | 0.92 | 0.86 | 0.97 |
| 4.97  | 6.50  | 59.12 | 0.94 | 0.87 | 1.00 |
| 4.49  | 4.80  | 59.13 | 0.45 | 0.41 | 0.48 |
| 9.75  | 10.13 | 59.46 | 1.08 | 0.93 | 1.13 |
| 9.45  | 9.63  | 59.59 | 1.01 | 0.91 | 1.06 |
| 9.17  | 8.83  | 60.12 | 0.99 | 0.84 | 1.04 |
| 8.04  | 9.93  | 60.56 | 1.01 | 0.94 | 1.09 |
| 12.24 | 10.21 | 60.65 | 1.02 | 0.95 | 1.06 |
| 6.44  | 6.62  | 62.10 | 0.69 | 0.60 | 0.77 |
| 6.55  | 6.60  | 62.27 | 0.76 | 0.64 | 0.84 |
| 9.82  | 12.53 | 64.05 | 1.35 | 1.25 | 1.37 |
| 10.36 | 10.20 | 65.37 | 1.11 | 0.96 | 1.15 |
| 10.25 | 10.18 | 66.48 | 1.06 | 0.96 | 1.09 |

---

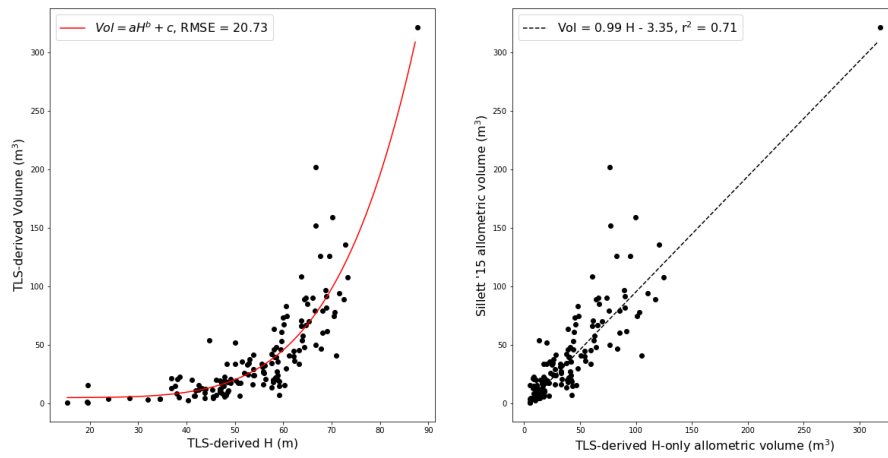

Figure S1: Volume estimated from TLS-derived values of H only, plotted in arithmetic space (left panel); scatter of volume predicted from TLS-derived H only allometry, against volume predicted by Sillett et al. (2015)<sup>19</sup> allometry (right panel).
